1                   **Association of Structural Variation with Cardiometabolic Traits in Finns**

2

3   Lei Chen,<sup>1,2,3</sup> Haley J. Abel,<sup>1,2</sup> Indrani Das,<sup>1</sup> David E. Larson,<sup>1,4</sup> Liron Ganel,<sup>1,2</sup> Krishna L. Kanchi,<sup>1</sup>  
4   Allison A. Regier,<sup>1,2</sup> Erica P. Young,<sup>1,5</sup> Chul Joo Kang,<sup>1</sup> Alexandra J Scott,<sup>1,2</sup> Colby Chiang,<sup>1,2</sup> Xinxin  
5   Wang,<sup>1,2,3</sup> Shuangjia Lu,<sup>3</sup> Ryan Christ,<sup>1</sup> Susan K. Service,<sup>6</sup> Charleston W.K. Chiang,<sup>7,8</sup> Aki S.  
6   Havulinna,<sup>9,10</sup> Johanna Kuusisto,<sup>11,12</sup> Michael Boehnke,<sup>13</sup> Markku Laakso,<sup>11,12</sup> Aarno Palotie,<sup>9,14,15</sup>  
7   Samuli Ripatti,<sup>9,15,16</sup> Nelson B. Freimer,<sup>6</sup> Adam E. Locke,<sup>1,2</sup> Nathan O. Stitzel,<sup>1,2,4,\*</sup> Ira M. Hall<sup>1,2,3,\*</sup>

8

9   <sup>1</sup> McDonnell Genome Institute, Washington University School of Medicine, St. Louis, MO, USA

10   <sup>2</sup> Department of Medicine, Washington University School of Medicine, St. Louis, MO, USA

11   <sup>3</sup> Department of Genetics, Yale University School of Medicine, New Haven, CT, USA

12   <sup>4</sup> Department of Genetics, Washington University School of Medicine, St. Louis, MO, USA

13   <sup>5</sup> Cardiovascular Division, Department of Medicine, Washington University School of Medicine, St.  
14   Louis, MO, USA

15   <sup>6</sup> Center for Neurobehavioral Genetics, Jane and Terry Semel Institute for Neuroscience and Human  
16   Behavior, University of California Los Angeles, Los Angeles, CA, USA

17   <sup>7</sup> Center for Genetic Epidemiology, Department of Preventive Medicine, Keck School of Medicine,  
18   University of Southern California, Los Angeles, CA, USA

19   <sup>8</sup> Quantitative and Computational Biology Section, Department of Biological Sciences, University of  
20   Southern California, Los Angeles, CA, USA.

21   <sup>9</sup> Institute for Molecular Medicine Finland (FIMM), HiLIFE, University of Helsinki, Helsinki, Finland

22   <sup>10</sup> Finnish Institute for Health and Welfare (THL), Helsinki, Finland

23   <sup>11</sup> Institute of Clinical Medicine, Internal Medicine, University of Eastern Finland, Kuopio, Finland

24   <sup>12</sup> Department of Medicine, Kuopio University Hospital, Kuopio, Finland

25 <sup>13</sup> Department of Biostatistics and Center for Statistical Genetics, University of Michigan School of  
26 Public Health, Ann Arbor, MI, USA

27 <sup>14</sup> Analytical and Translational Genetics Unit (ATGU), Psychiatric & Neurodevelopmental Genetics Unit,  
28 Departments of Psychiatry and Neurology, Massachusetts General Hospital, Boston, MA, USA

29 <sup>15</sup> Broad Institute of MIT and Harvard, Cambridge, MA, USA

30 <sup>16</sup> Department of Public Health, Faculty of Medicine, University of Helsinki, Finland

31 \* corresponding authors

32 **Correspondence emails:** [ira.hall@yale.edu](mailto:ira.hall@yale.edu) (I.M.H.); [nstitziel@wustl.edu](mailto:nstitziel@wustl.edu) (N.O.S.)

33

#### 34 **Abstract**

35 The contribution of genome structural variation (SV) to quantitative traits associated with  
36 cardiometabolic diseases remains largely unknown. Here, we present the results of a study examining  
37 genetic association between SVs and cardiometabolic traits in the Finnish population. We used  
38 sensitive methods to identify and genotype 129,166 high-confidence SVs from deep whole genome  
39 sequencing (WGS) data of 4,848 individuals. We tested the 64,572 common and low frequency SVs for  
40 association with 116 quantitative traits, and tested candidate associations using exome sequencing and  
41 array genotype data from an additional 15,205 individuals. We discovered 31 genome-wide significant  
42 associations at 15 loci, including two novel loci at which SVs have strong phenotypic effects: (1) a  
43 deletion of the *ALB* gene promoter that is greatly enriched in the Finnish population and causes  
44 decreased serum albumin level in carriers ( $p=1.47 \times 10^{-54}$ ), and is also associated with increased levels  
45 of total cholesterol ( $p=1.22 \times 10^{-28}$ ) and 14 additional cholesterol-related traits, and (2) a multiallelic copy  
46 number variant (CNV) at *PDPR* that is strongly associated with pyruvate ( $p=4.81 \times 10^{-21}$ ) and alanine  
47 ( $p=6.14 \times 10^{-12}$ ) levels and resides within a structurally complex genomic region that has accumulated  
48 many rearrangements over evolutionary time. We also confirmed six previously reported associations,  
49 including five led by stronger signals in single nucleotide variants (SNVs), and one linking recurrent *HP*  
50 gene deletion and cholesterol levels ( $p=6.24 \times 10^{-10}$ ), which was also found to be strongly associated

51 with increased glycoprotein level ( $p=3.53 \times 10^{-35}$ ). Our study confirms that integrating SVs in trait-  
52 mapping studies will expand our knowledge of genetic factors underlying disease risk.

53

## 54 **Introduction**

55 Common human diseases affecting the cardiovascular and endocrine systems are known to be  
56 associated with a variety of quantitative risk factors including various measures of cholesterol,  
57 metabolites, insulin, glucose, blood pressure, and obesity. Understanding the genetic basis of these  
58 and other quantitative traits can shed light on the etiology, prevention, diagnosis, and treatment of  
59 disease. Family and population-based studies have shown significant heritability for many  
60 cardiometabolic traits, and prior genome-wide association studies (GWAS) have identified hundreds of  
61 associated loci. However, most prior trait-mapping studies have focused on common variants  
62 ascertained by genotyping arrays, or rare coding variants measured by exome sequencing, leaving out  
63 the contribution of larger and more complex forms of genome variation.

64 Of particular interest is the contribution of genome structural variation (SV), which encompasses  
65 diverse variant types larger than 50 base pairs (bp) in size, including copy number variants (CNVs),  
66 mobile element insertions (MEIs), inversions, and complex rearrangements. Although rare and *de novo*  
67 SVs have long been recognized to cause various rare and sporadic human disorders, and somatic SVs  
68 play a central role in cancer biology, the extent to which SVs contribute more generally to common  
69 diseases and other complex traits in humans is less clear. Early genome-wide studies<sup>1-3</sup> failed to  
70 identify SVs associated with common diseases, but these were limited by the use of low-resolution  
71 array platforms, which only capture extremely large CNVs (>100kb, or similar), and by modest sample  
72 size. Several later studies performed targeted analysis of known SVs combined with larger-scale  
73 GWAS data<sup>4-6</sup>, leading to the association of structural alleles at *HP* and *LPA* with cholesterol levels.  
74 More recent array-based CNV association studies with large sample sizes (>50,000 individuals) have  
75 revealed several genome-wide significant CNV loci for anthropometric traits and coronary disease, but  
76 these studies focused on extremely large CNVs representing <1% of the overall SV burden, leaving

77 most SVs untested<sup>7-9</sup>. Fine mapping of expression quantitative trait loci (eQTLs) using deep whole  
78 genome sequencing (WGS) data has indicated that SVs are the causal variant at 3.5-6.8% of eQTLs,  
79 and that causal SVs have larger effect sizes than causal single nucleotide variants (SNVs) and indels  
80 and are often not well-tagged by flanking SNVs<sup>10,11</sup>. This suggests that direct assessment of SVs in  
81 WGS-based complex trait association studies has the potential to reveal novel causative variants not  
82 found through other approaches.

83 Here, we have performed a SV association study using deep (>20x) WGS data from 4,030  
84 individuals from Finland with extensive cardiometabolic trait measurements, and extended these results  
85 to a larger set of 15,205 individuals with whole exome sequencing (WES) and single nucleotide  
86 polymorphism (SNP) genotype data. Compared to prior work, our study benefits from (1)  
87 comprehensive SV ascertainment due to the use of deep WGS data and complementary SV detection  
88 methods, (2) deeply phenotyped individuals with existing SNP array and exome sequence data, and (3)  
89 the unique history of the Finnish population, which was shaped by multiple population bottlenecks and  
90 rapid population expansions, leading to an enrichment of some otherwise rare and low-frequency  
91 variants that can be detected by trait association at relatively modest sample sizes<sup>12-14</sup>. By testing for  
92 associations between structural variants and cardiometabolic traits, we identified 15 genome-wide  
93 significant loci, nine of which remained significant after multiple testing correction for the number of  
94 phenotypes, including a Finnish-enriched promoter deletion of the *ALB* gene associated with multiple  
95 traits, and a multiallelic CNV affecting the *PDPR* gene associated with pyruvate levels.

96

## 97 **Material and Methods**

### 98 **Samples and phenotype collection**

99 The genomic data in this study come from 10,197 METSIM participants collected from Kuopio in  
100 Eastern Finland, and 10,192 FINRISK participants collected from northeastern Finland. Both studies  
101 were approved by the Ethics Committees in Finland and all individuals contributing samples provided  
102 written informed consent. Besides collecting genotype data by SNP array and exome sequencing, both

103 studies measured up to 254 quantitative cardiometabolic traits, among which we selected 116 traits  
104 with adequate sample sizes to maintain trait-mapping power (see below). All phenotype data were  
105 residualized for trait-specific covariates and transformed to a standard normal distribution by inverse  
106 normalization. Complete details of sample collection, genotype acquisition, and trait adjustments were  
107 described previously<sup>14</sup>.

108

### 109 **Power estimation and phenotype selection**

110 Phenotypes with limited sample size are likely to be underpowered in trait-mapping analysis and  
111 increase the test burden if included. Thus, we selected 116 traits with large enough sample size that  
112 guaranteed 80% power to detect a hypothesized rare SV (Minor allele count (MAC) =10) with strong  
113 effect (explained 8.4% of the additive quantitative trait locus (QTL) variance, a contribution comparable  
114 to the effect of SV expression QTLs<sup>10</sup>). We estimated the minimum required sample size as 375  
115 through an analytical approach implemented in Genetic Power Calculator<sup>15</sup>. Several other assumptions  
116 for the calculation are: 1. All samples are independent (sibship size=1); 2. The top signal is in perfect  
117 linkage disequilibrium (LD) with the causal variant; and 3. type I error rate= $1 \times 10^{-6}$ .

118

### 119 **Generation of SV callsets from WGS data**

120 For SV discovery, we used WGS data from 3,082 METSIM participants and 1,114 FINRISK participants  
121 sequenced at the McDonnell Genome Institute under the NHGRI Centers for Common Disease  
122 Genomics (CCDG) program. To increase variant detection sensitivity, we also included 779 additional  
123 Finnish participants from other cohorts and 112 multi-ethnic samples from 1000 Genomes (1KG)  
124 Project. All genomes were sequenced at >20x coverage on the Illumina HiSeq X and NovaSeq  
125 platforms with paired-end 150bp reads.

126 WGS data were aligned to the GRCh38 reference genome using BWA-MEM and processed  
127 using the functional equivalence pipeline<sup>16</sup>. An SV callset based on breakpoint mapping was generated  
128 using our recently published workflow<sup>17</sup> using the same methods as in our recent study of 17,795

129 human genomes<sup>18</sup>. Briefly, we ran LUMPY (v0.2.13)<sup>19</sup>, CNVnator (v0.3.3)<sup>20</sup>, and svtyper (v0.1.4)<sup>21</sup> to  
130 perform per-sample variant calling. After removing 22 samples that failed quality control, we merged  
131 sites discovered in all the samples and re-genotyped all sites in all samples to create a joint callset  
132 using svtools (v0.3.2)<sup>17</sup>. Each variant was characterized as either deletion (DEL), duplication (DUP),  
133 inversion (INV), mobile element insertion (MEI), or generic rearrangement of unknown architecture  
134 (BND), based on comprehensive review of its breakpoint genotype, breakpoint coordinates, genome  
135 annotation, and read-depth evidence, as described previously<sup>17,18</sup>. According to our definition of SV, we  
136 filtered variants smaller than 50bp. Moreover, we tuned the callset based on Mendelian error rate and  
137 flagged BNDs with mean sample quality (MSQ) score <250 and INVs with MSQ <100 as low-  
138 confidence variants. Details about this QC strategy are described elsewhere<sup>18</sup>. For convenience, we  
139 refer to this as the “LUMPY callset”.

140 We applied two read-depth based CNV detection methods to WGS data to detect variants that  
141 might be missed by breakpoint mapping. GenomeSTRiP<sup>22</sup> is an established tool for cohort-level CNV  
142 discovery that has proven effective in many prior studies; however, when using the recommended  
143 parameters (as we did here), detection is limited to larger CNVs (>1kb) within relatively unique genomic  
144 regions. Thus, in parallel we used a custom cohort-level CNV detection pipeline based on CNVnator<sup>20</sup>  
145 to detect smaller and more repetitive CNVs (see below).

146 We adapted the original GenomeSTRiP pipeline (v2.00.1774) for the large cohort of 5,087  
147 Finnish samples: after the SVPprocess step, samples were grouped by study cohorts and sorted by  
148 sequencing dates, then split into 54 batches with maximum size of 100. CNVs were detected within  
149 each batch by CNVDiscoveryPipeline and classified as either deletion (DEL), duplication (DUP), or  
150 mixed CNV (mCNV), with both copy number gain and loss existing in the population (referred to as  
151 “multiallelic CNV” in the text). Next, we concatenated variants from the 54 batch VCFs and re-  
152 genotyped all variants in all samples using SVGenotyper to produce a joint callset. Then we ran several  
153 GenomeSTRiP annotators (CopyNumberClassAnnotator, RedundancyAnnotator) to reclassify variants  
154 and remove redundant variant calls. During callset generation, 72 samples with abnormal read-depth  
155 profiles were excluded.

156 The read-depth based “CNVnator” callset was constructed using a custom pipeline that took as  
157 inputs the individual-level CNV callsets generated by CNVnator during the svtools pipeline. After  
158 removing samples with abnormal read-depth profiles, CNV calls from 4,979 samples were sorted and  
159 merged using the svtools pipeline. All merged CNV calls were re-genotyped in all samples using  
160 CNVnator. Within each connected component of overlapping CNV calls, individual variant calls were  
161 clustered based on correlation of copy-number profiles and by pairwise overlap. For each cluster, a  
162 single candidate was chosen to represent the underlying CNV. For sites with carrier frequency >0.1%,  
163 we fit the copy number distribution to a series of constrained Gaussian Mixture Models (GMMs) with  
164 varying numbers of components, and selected the site with the “best” variant representation based on a  
165 set of model metrics, including the Bayesian Information Criterion (BIC) and the distance between  
166 cluster means (“mean\_sep”). For the remaining sites we selected those with the most significant copy  
167 number difference between carriers and non-carriers. With the same criteria used in GenomeSTRiP,  
168 we assigned integer copy number genotypes and CNV categories to the variants.

169 We used array intensity data for 2,685 METSIM samples to estimate the false discovery rate  
170 (FDR) under different filtering criteria, and to tune both CNV callsets. FDR was estimated from the  
171 Intensity Rank Sum (IRS) test statistics based on CNVs intersecting at least two SNP probes. Based on  
172 the FDR curves (**Figure S1**) we excluded GenomeSTRiP variants with GSCNQUAL score < 2 and  
173 CNVnator DELs and DUPs with mean\_sep < 0.47 or low carrier counts (DUPs < 1, DELs < 5, mCNVs < 7).

174 To eliminate likely false positive calls introduced by sequencing artefacts, we excluded 612  
175 LUMPY SVs, 740 GenomeSTRiP SVs, and 1098 CNVnator SVs that were highly enriched in any of the  
176 three sequencing year batches ( $P < 10^{-200}$  from Fisher’s exact test). We further excluded 3 samples in  
177 the LUMPY callset, 72 samples in the GenomeSTRiP callset, and 12 samples in the CNVnator callset  
178 that carried abnormal numbers of variants (outlier samples defined by the difference of per-sample SV  
179 count from median divided by mad larger than 10 for LUMPY/GenomeSTRiP or larger than 5 for  
180 CNVnator). Together with the samples that failed QC during variant calling, the combined list of outliers  
181 consists of 84 METSIM samples, 56 FINRISK samples, and 99 samples from other cohorts. More  
182 information about sample- and variant-level exclusions can be found in **Table S1**.

183 For each high-confidence callset, we evaluated the final FDR by using the IRS, and ran the  
184 TagVariants annotator in GenomeSTRiP to estimate the proportion of SVs in LD with nearby SNPs  
185 ( $R_{\max}^2 \geq 0.5$ , flanking window size=1Mb). We calculated the overlap fraction between SV callsets by  
186 bedtools<sup>23</sup> intersect (v2.23.0) requiring >50% reciprocal overlap between variants. To evaluate the  
187 genotype redundancy within and between callsets, we compared the original variant counts and the  
188 equivalent number of independent genetic variables estimated by a matrix decomposition method  
189 implemented in matSpDlite<sup>24</sup>, using the genotype correlation matrix as input. The space clustering was  
190 evaluated by running bedtools cluster with -d (max distance) specified as 10bp.

191

### 192 **Association test with WGS data**

193 For CNV callsets, we defined minor allele count (MAC) as the number of samples with different  
194 genotypes from the mode copy number. We kept the conventional MAC definition for the LUMPY  
195 callset since it primarily contains biallelic SVs. We set the minimum MAC threshold as 10 for variants to  
196 be included in the trait association test. We renormalized the phenotype data of the WGS samples by  
197 rank-based inverse normal transformation. We performed single-variant association tests across all  
198 renormalized metabolic traits using the EMMAX model<sup>25</sup> implemented in EPACTS (v3.2.9) software<sup>26</sup>.  
199 In the model, we specified the input genotype variables as the integer copy number genotype for  
200 GenomeSTRiP variants, allele balance for LUMPY variants, and raw decimal copy number for  
201 CNVnator variants. We also incorporated in the model a kinship matrix derived from SNP data by  
202 EPACTS to account for sample relatedness and population stratification.

203 We applied matSpDlite<sup>24</sup> to estimate the equivalent number of independent tests. The genome-  
204 wide significance threshold was set at  $1.89 \times 10^{-6}$  after Bonferroni correction at level  $\alpha = 0.05$  over  
205 26,495 independent genetic variables, and the experiment-wide significance threshold was set as  
206  $3.32 \times 10^{-8}$  to further correct for the 57 independent phenotypic variables also estimated using  
207 matSpDlite<sup>24</sup>.

208



## 209 **Replication using exome and array data**

210 We attempted to replicate the association signals with a nominal  $p < 0.001$  in WGS analysis using  
211 genotype data for an additional ~15,000 FinMetSeq participants. To achieve this, we employed two  
212 approaches to infer the genotypes of candidate SVs from WES and array data: WES read depth  
213 analysis for CNVs and genotype imputation for biallelic SVs.

214 We separated the WES alignment data into two batches: the first composed of 10,379 samples  
215 sequenced with 100bp paired-end reads and the second composed of 9,937 samples sequenced with  
216 125bp paired-end reads. For samples in each batch, we calculated the per-sample per-exon coverage  
217 by GATK<sup>27</sup> DepthOfCoverage (v3.3-0) and adopted the data processing steps from the XHMM (v1.0)  
218 pipeline<sup>28</sup> to convert the raw coverage data into PCA-normalized read-depth z-scores. Duplicated and  
219 outlier samples were filtered simultaneously, with 9,537 samples left in batch1 and 9,864 samples left in  
220 batch2. We calculated the correlation between SV genotypes from WGS data and the normalized read-  
221 depth z-scores of exons intersected or nearby (<5kb) using samples with both WES and WGS data.  
222 Exons with  $R^2 < 0.1$  were filtered out and the rest were passed on to validation, restricted to samples  
223 absent from the WGS analysis (n=15,205). The genetic relationship matrix used for WES replication  
224 was generated in a previous study<sup>14</sup>. We later did a meta-analysis under a fixed effect model using  
225 METASOFT (v2.0.1)<sup>29</sup> to combine the results from the two WES batches, considering the two  
226 sequencing batches were actually sampled from the same population.

227 We converted the copy number genotypes (CN=2,3,4...) of 2,291 biallelic candidate SVs to  
228 allelic genotype format (GT=0/0, 0/1, 1/1) and extracted the SNPs and indels in the 1 Mb flanking  
229 regions of those SVs from the GATK callset generated from the same WGS data. We then phased the  
230 joint VCF with Beagle (version 5.1)<sup>30</sup> to build a reference panel composed of 3,908 high-quality  
231 samples shared by the SV callset and the SNP callset. Then, we imputed the SV genotype in the  
232 additional 15,125 FinMetSeq samples with array genotype data by running Beagle on the genotyped  
233 SNPs. We filtered out low-imputation-quality SVs with  $DR2 < 0.3$  reported by Beagle (the estimated  
234 correlation between imputed genotype and real genotype of each variant); then ran the EMMAX model  
235 on the 1,705 well-imputed SVs with the corresponding traits.

236 58 of the 2,053 candidate SVs had both imputed genotype and WES read-depth genotype, so  
237 we compared the imputation DR2 with exon-SV genotype  $R^2$ , then chose the measurement better  
238 correlated with the WGS data. We then used Fisher's method to combine the p-values from discovery  
239 stage (WGS data only) and replication stage. As a sanity check for the imputation quality, we  
240 conducted leave-one-out validation for the eight genome-wide significant SVs using the reference panel  
241 only. Specifically, we took one sample out each time as a test genome and imputed the SV genotype  
242 using the other 3,907 samples as reference and repeated the process 3,908 times to calculate the  
243 validation rate.

244 The array data and WES data were aligned to reference genome GRCh37 while the WGS data  
245 were aligned to reference genome GRCh38. For analysis, the coordinates were lifted over using the  
246 LiftOver utility from the UCSC GenomeBrowser (<https://genome.ucsc.edu/cgi-bin/hgLiftOver>).

247

#### 248 **Candidate analysis**

249 For genome-wide significant trait-SV associations, we collected previous GWAS signals on the same  
250 chromosome with  $P < 10^{-7}$  from the EBI GWAS catalogue ([https://www.ebi.ac.uk/gwas/docs/file-](https://www.ebi.ac.uk/gwas/docs/file-downloads)  
251 [downloads](https://www.ebi.ac.uk/gwas/docs/file-downloads), 2019-11-21 version) with the same set of keywords used in a previous study<sup>14</sup> (one  
252 publication based on METSIM samples was excluded to only include findings from independent  
253 studies). We then performed conditional analysis on the original trait-SV pairs adding the GWAS hits as  
254 covariates. Conditional analyses were restricted to samples with WGS data to minimize the difference  
255 in genotype accuracy of the SV callset vs. the SNP callset.

256 For loci containing multiple genotype-correlated SVs associated with a trait, we lumped the  
257 variants together using `bedtools merge`<sup>23</sup> and reported the coordinates of the entire region with the  
258 summary statistics of the strongest signal. To better understand these loci, we manually curated the  
259 candidates in IGV<sup>31</sup> and extended the regions of interest to include surrounding genes, functional  
260 elements, previous GWAS signals and other genome annotations. We then equally split each region  
261 into ~1000 windows and used CNVnator to calculate the copy number values of those windows for 100

262 individuals selected to represent all genotype groups. We then plotted the window-sample copy number  
263 matrix as a heatmap with scales best presenting the locus structure (e.g. **Figure 4**). In addition, for  
264 SNPs in the same region, we calculated the SNP-SV genotype correlation  $R^2$  by a linear regression  
265 model and SNP-trait p values by EMMAX, then plotted them together in a local Manhattan plot (e.g.  
266 **Figure 3**) using custom R scripts.

267 For the fine-mapping experiment of albumin, we selected the top 100 most significant SNPs on  
268 chr4:67443182-79382541 plus the *ALB* promoter deletion to calculate the pairwise genotype correlation  
269 matrix and ran CAVIAR (v0.2)<sup>32</sup> on those 101 variants, with the “rho” probability set at 0.95 and varying  
270 the maximum number of causal variants one to five. The same experiment was done for total  
271 cholesterol. We used the model with maximum causal variants set at two to plot the posterior  
272 probability in **Figure 3**.

273

## 274 **Results**

### 275 **Structural variation detection and genotyping**

276 We identified 120,793 SVs by LUMPY<sup>19</sup>, 111,141 CNVs by GenomeSTRiP<sup>22</sup> (GS), and 92,862 CNVs  
277 by our customized pipeline based on CNVnator<sup>20</sup>. Considering the different genotype metrics and  
278 detection resolutions, to retain sensitivity we chose to concatenate those three callsets together and  
279 adjust for redundancy later instead of merging the variants. 129,166 high-confidence autosomal SVs  
280 passed quality control, and 64,572 passed the frequency filter for association tests. **Figures 1 and 2**  
281 provide an overview of the high-confidence callset, including the composition, frequency, and size  
282 distribution broken down by SV types, biallelic vs. multi-allelic SVs, and detection pipelines. The SV  
283 size and frequency distributions are consistent with those in previous studies<sup>10,18,33,34</sup>: most called SVs  
284 are relatively small (<10kb), biallelic and rare; called MEIs exhibit the expected size distribution  
285 corresponding to Alu and L1 insertions; and allele frequency decreases with increased mean SV size,  
286 consistent with negative selection against large SVs (**Figure 2**).

287 Based on comparison with a set of SNP array intensity data (see **Methods**), we estimate an  
288 overall false discovery rate (FDR) of 4.7% for the high-confidence callset. As an indicator of true  
289 positive rate, the proportion of SV calls tagged by nearby SNPs ( $R^2 \geq 0.5$ , see **Methods**) was 56.8%,  
290 consistent with our prior GTEx study that used similar methods<sup>10</sup> and was evaluated extensively in the  
291 context of eQTL mapping. We also compared our callset to the high-quality SV callsets from 1000  
292 Genomes (1KG) and gnomAD projects and found an overlap of 35.2%, which is reasonable considering  
293 that these studies used distinct methods and sample sets. **Table 1** shows the above metrics stratified  
294 by pipelines. We estimated the genotype redundancy in total and stratified by pipelines (**Table S2**).  
295 Overall, the “effective sample size” of independent genetic variables was 55.5% of the original variant  
296 count. Additionally, since read-depth detection methods commonly result in “fragmented” CNV calls, we  
297 estimated the fragmentation level of calls by clustering variants within 10bp and measured the size of  
298 the clusters (**Table S3**).

299 Our CNVnator pipeline was the major source of redundancy and fragmentation since it detects  
300 CNVs with higher resolution – as small as 100bp – and covers repetitive and low-complexity regions,  
301 where the coverage profile is in general much noisier than the rest of the genome. The benefit is that  
302 CNVnator detected many true CNVs missed by the two other methods. As a benchmark of the  
303 sensitivity gain, we calculated the external validation rates for SVs uniquely detected in each of our  
304 pipelines (**Figure S2**). 7,210 variants identified only in CNVnator overlapped with variants in 1KG and  
305 gnomAD, contributing to the 43.1% of the overall CNVnator SVs that were validated through  
306 comparison to external datasets.

307

### 308 **Association of SVs with cardiometabolic traits**

309 We first performed single variant association tests for 64,572 high-confidence SVs ( $MAC \geq 10$ ) and 116  
310 quantitative traits using the EMMAX model<sup>25</sup> in the 4,030 individuals with WGS data. We defined the  
311 genome-wide significance threshold as  $1.89 \times 10^{-6}$  and the experiment-wide significance threshold as  
312  $3.32 \times 10^{-8}$  (see **Methods**). Nine associations of six loci passed genome-wide significance threshold

313 (**Table S5**); six were still significant after adjusting for the equivalent number of independent  
314 phenotypes (**Table 2**, WGS P).

315 We next sought to replicate these findings and to follow up on 4,855 loci with sub-threshold  
316 associations ( $p < 0.001$ ) via meta-analysis with larger WES ( $n = 20,316$ ) and array genotype datasets  
317 ( $n = 19,033$ ) from these same cohorts, using independent samples ( $n_{\text{WES}} = 15,205$ ,  $n_{\text{array}} = 15,125$ ) not  
318 included in the original WGS experiment (see **Methods**)<sup>14</sup>. We developed a strategy to genotype  
319 coding CNVs from WES data using read-depth information from XHMM<sup>28</sup>, and measured copy number  
320 at the 20,058 exons intersecting with 819 candidate CNVs from WGS. We found that 281 exons from  
321 392 CNV calls were able to recapture the copy number variability detected by WGS (at  $R^2 > 0.1$ ). To  
322 genotype SVs using array data, we used standard imputation methods to impute 2,127 bi-allelic SVs  
323 based on the background of array-genotyped SNPs (see **Methods**). The estimated imputation accuracy  
324 of SVs corresponding well to their LD with nearby SNPs, as expected (**Figure S3**). To assess  
325 performance more rigorously for the eight significant SVs described below, we also performed a leave-  
326 one-out experiment, and the validation rate ranged from 93.3%-99.8% (**Table S4**). Overall, we were  
327 able to accurately genotype 2,053 of 4,864 candidate SVs using exome ( $n = 392$ ) and/or array genotype  
328 data ( $n = 1,705$ ). We then ran single-variant tests on those genotyped SVs with the corresponding  
329 candidate traits in the independent samples, and performed a meta-analysis to calculate a combined p-  
330 value (**Table 2**).

331 After merging fragmented SVs, we ended up with 15 independent loci associated with 31 traits  
332 at genome-wide significance, 9 of which remained significant after correction for the multiple  
333 phenotypes. **Table 2** shows the summary statistics of the lead SVs for their top traits (see also **Table**  
334 **S5** for pre-merged summary statistics).

335

### 336 **Deletion of the *ALB* gene promoter is associated with multiple traits**

337 The strongest signal in the combined study was a 4kb deletion immediately upstream of the *ALB* gene,  
338 affecting the promoter region (**Figure 3**). This variant was 16-fold enriched in the Finnish population

339 compared to non-Finnish Europeans from 1KG (MAF: 1.6% vs. 0.1%) and was associated with 16 traits  
340 at genome-wide significance (**Table S5, Figure S4**). The top two associations were with serum albumin  
341 ( $p=1.47 \times 10^{-54}$ ) and total cholesterol ( $p=1.22 \times 10^{-28}$ ), and these are independent signals based on  
342 conditional analyses. The cholesterol signal appears to explain the remaining 14 trait associations, all  
343 of which are highly correlated (**Figure S4**). This SV was well-tagged by nearby SNPs ( $R^2=0.73$ ), and  
344 the tagging SNPs showed similar trait association patterns. To tease apart potentially indirect  
345 associations caused by LD, we performed fine-mapping analysis for serum albumin and total  
346 cholesterol with CAVIAR<sup>32</sup> including the deletion variant and the 100 most significant SNPs on chr4:67-  
347 79Mb (see **Methods**). The top candidate for the association with total cholesterol was a SNP  
348 (rs182695896) in moderate LD ( $R^2=0.49$ ) with the deletion. Accounting for this SNP via conditional  
349 analysis attenuated the association between the deletion and total cholesterol ( $p=0.023$ ,  $n=4014$ ). The  
350 deletion was identified as the most probable causal variant for the association with albumin, and the  
351 association between the deletion and albumin remained significant after adjusting for rs182695896  
352 ( $p=6.52 \times 10^{-13}$ ,  $n=3,117$ ). We also observed different causality patterns for the two traits by aligning the  
353 posterior probabilities with the LD structure of the causal candidates in 95% confidence sets (**Figure 3**).  
354 Thus, we hypothesize that the promoter deletion directly affects serum albumin by altering *ALB* gene  
355 expression, and is associated with total cholesterol through its genetic correlation with other underlying  
356 causal variant(s) in the same LD block.

357 Prior studies<sup>35-38</sup> have reported five albumin associated SNPs and two cholesterol associated  
358 SNPs in this region. In our conditional analyses including all intrachromosomal GWAS hits<sup>39</sup>, the SV-  
359 albumin association remained genome-wide significant (**Table 2**) while the SV-cholesterol association  
360 was diminished (conditioned  $p=0.004$ ). To investigate the relationship between our signal and each of  
361 the seven previous GWAS SNPs, we tested the SV for association while conditioning on the reported  
362 SNPs one at a time (**Table S6**) and ran the association tests on those SNPs with the SV as covariate  
363 (**Table S7**). These results suggest that the *ALB* deletion is the causal variant for three prior albumin  
364 associations (rs16850360, rs2168889, and rs1851024), is linked to one previously reported cholesterol

365 association (rs182616603), and is independent of two prior albumin associations (rs115136538,  
366 rs184650103) and one cholesterol association (rs117087731).

367 We next explored the potential downstream effects of this promoter deletion in the FinnGen  
368 dataset<sup>40</sup>, which reports GWAS results for 1,801 disease endpoints in 135,638 individuals. We queried  
369 the top SV-tagging SNP (rs187918276,  $R^2=0.73$ ) in the PheWeb browser<sup>40</sup> (**Figure S5**); the top  
370 association was with statin medication use ( $p=6.5 \times 10^{-69}$ ). The second set of signals appeared in the  
371 “Endocrine, nutritional and metabolic diseases” category, led by disorders of lipoprotein metabolism  
372 and other lipidemias ( $p=1.4 \times 10^{-11}$ ), pure hypercholesterolemia ( $p=3.0 \times 10^{-11}$ ), and metabolic disorders  
373 ( $p=1.8 \times 10^{-7}$ ). These results support the medical relevance of genetic variation at this locus suggested  
374 by this and prior work; however, it is unclear whether these results are due to the *ALB* promoter  
375 deletion or the linked variants (e.g., rs182695896) associated with cholesterol.

376

#### 377 **A multi-allelic CNV at *PDPR* is associated with pyruvate and alanine levels**

378 We identified a cluster of 13 highly correlated CNV calls at chr16q22.1 that were strongly associated  
379 with pyruvate ( $p=4.81 \times 10^{-21}$ ) and alanine ( $p=6.14 \times 10^{-12}$ ) levels in the serum. We reconstructed the copy  
380 number profile of this locus from short-read WGS data (see **Methods**) and confirmed that the 13  
381 correlated variant calls correspond to a single ~250kb multiallelic CNV (CNV1 in **Figure 4**) spanning  
382 the coding sequence and 5' region of *PDPR*, a gene involved in the pyruvate metabolism pathway.  
383 *PDPR* encodes the regulatory subunit of pyruvate dehydrogenase phosphatase (PDP) which catalyzes  
384 the dephosphorylation and reactivation of pyruvate dehydrogenase complex, the catalyst of pyruvate  
385 decarboxylation. According to this mechanism, fewer copies of *PDPR* should slow down the  
386 decarboxylation reaction and lead to increased pyruvate levels, and increased copies should decrease  
387 pyruvate levels, consistent with our data (**Figure 4**). This CNV was also negatively associated with  
388 alanine levels, the product of pyruvate transamination, and conditional analysis suggested this  
389 association was mediated through pyruvate (**Table S8**).

390 An intriguing aspect of the *PDPR* locus is that it contains numerous segmental duplications  
391 (SDs), including highly similar local SDs scattered throughout the *PDPR* locus, additional SDs at a  
392 *PDPR* pseudogene (*LOC283922*) located 4 Mb distal to *PDPR*, as well as more divergent copies  
393 located ~55Mb away on chr16p13.11. These include LCR16a, a core element shared by many SDs on  
394 Chr16 and a well-known driver of the formation of complex segmental duplication blocks in the  
395 genomes of humans and primates<sup>41–43</sup>. There are both duplication and deletion alleles of the *PDPR*  
396 gene, and these have indistinguishable breakpoints that correspond to LCR16a duplicons, suggesting  
397 these CNVs were caused by recurrent non-allelic homologous recombination. Similar to the *ALB*  
398 deletion described above (and many prior coding associations<sup>14</sup>), this CNV appears to be enriched in  
399 the Finnish population: the duplication allele was identified in 1KG with a frequency of 0.005 in non-  
400 Finnish Europeans, 50x less than the 0.025 frequency observed in our Finnish sample, and the  
401 deletion allele was not detected in 1KG. The CNV is poorly tagged by flanking SNPs (max  $R^2 < 0.088$ ),  
402 making it virtually undetectable using standard GWAS methods.

403 In addition, a second highly polymorphic and multiallelic CNV (CNV2 in **Figure 4**) intersects with  
404 CNV1 and covers >90% of the gene body of *PDPR*, missing the first three exons. Notably, CNV2 did  
405 not show association with pyruvate levels in our data ( $p=0.6$ ), despite being previously reported as a  
406 *cis*-eQTL for *PDPR* in multiple tissues<sup>10</sup>. To resolve the structure of this locus, we aligned chromosome  
407 16 of the GRCh38 reference against itself and also against the recent high-quality CHM13 assembly<sup>44</sup>  
408 created from long-read sequencing data (**Figure S6**). Interestingly, we found that the sequence of  
409 CNV2 contains three inverted paralogs of the *LOC283922* locus (a *PDPR* pseudogene) in the CHM13  
410 assembly, while there is only one copy of *LOC283922* in GRCh38 (**Figure 4**). These data suggest that  
411 CNV2 reflects highly variable structural alleles of *LOC283922* located 4Mb away from *PDPR*, and thus  
412 it is not surprising that this CNV does not affect pyruvate levels.

413

414 **Additional trait-association signals**



415 We confirmed a previously reported association between the recurrent *HP* deletion and decreased total  
416 serum cholesterol levels<sup>4</sup>. In our data, this same deletion was strongly associated with serum  
417 glycoprotein acetyls quantified by NMR ( $p=3.53 \times 10^{-35}$ ), and conditional analysis showed that the two  
418 associations were independent (**Table S8**). Since Boettger et al.<sup>4</sup> proposed a plausible mechanism for  
419 the association of *HP* copy number and cholesterol, here we focus on the glycoprotein association. As  
420 a serum glycoprotein, haptoglobin forms dimers in individuals with the HP1/HP1 genotype  
421 (homozygous deletion) but forms multimers in individuals carrying HP2 allele(s). The multimers can be  
422 as large as 900kDa – more than twice the size of the dimers (86kDa)<sup>45</sup> – which could result in fewer  
423 haptoglobin molecules in HP2 carriers, and consequently fewer glycoprotein molecules overall.

424 We identified five trait associations involving common SVs that were within 1Mb of previously  
425 published GWAS loci for the same traits. All SVs were well-tagged by SNPs ( $R^2 > 0.9$ ) and were either  
426 intronic or upstream of genes that are functionally related to the associated phenotypes. In all five  
427 cases there were stronger SNP signals nearby, and the SV associations dropped to not more than  
428 nominal significance when conditioned on the known GWAS SNPs (**Table 2**). This suggests that  
429 instead of having independent effects on the phenotypes, those SVs were more likely to be in LD with  
430 the causal variants.

431 Additionally, we identified a low-frequency (MAF=0.01) SV associated with serum tyrosine  
432 levels (combined  $p=4.17 \times 10^{-10}$ ). This variant was a 4kb deletion of *IL34*, affecting the first exon of one  
433 transcript isoform and the intronic region of the two longer isoforms. There is a stronger signal from a  
434 SNP (rs190782607,  $p=1.44 \times 10^{-11}$ ) within 100kb of and partially tagging the SV ( $R^2=0.61$ ), indicating that  
435 the SV is unlikely to be the causal variant. However, the p-value of this association remained at a  
436 similar level when conditioned on known GWAS SNPs<sup>39</sup> (**Table 2**), suggesting a novel signal. *IL34*  
437 mediates the differentiation of monocytes and macrophages and to our knowledge has not previously  
438 been reported to be associated with amino acid traits<sup>46</sup>. *IL34* is a crucial gene in the immune pathway  
439 and one study<sup>47</sup> reported altered phenylalanine to tyrosine ratios associated with the immune activation  
440 and inflammation in CVD patients, which could explain the initial association as immune response

441 related amino acid change. In addition, several studies<sup>48,49</sup> have reported increased serum *IL34* levels  
442 in some cardiometabolic diseases that could potentially serve as a biomarker<sup>50,51</sup>.

443 The re-discovery of known loci described above demonstrates the effectiveness of our study  
444 design. Our CNV detection pipeline also detected two associations with metabolic traits that appear to  
445 be related to blood cell-type composition rather than inherited genetic variation. We identified three  
446 clusters of CNVs on chr7q34, chr7p14 and chr14q11.2 associated with C-reactive Protein (CRP) levels  
447 in the plasma, a biomarker for inflammation and a risk factor for heart disease (**Table 2, Table S5**).  
448 These CNVs are large, involve subtle alterations in copy number, and correspond to T cell receptor loci,  
449 suggesting that they are likely to reflect somatic deletions due to V(D)J recombination events during T  
450 cell maturation. This hypothesis was supported by the read-depth coverage pattern (see **Figure S7**),  
451 where the measured copy number is lowest at the recombination signal sequence (RSS) used  
452 constitutively for rearrangement, and gradually increases with increasing distance to the RSS. The  
453 cause of this association is unclear but may reflect increased T-cell abundance and CRP levels due to  
454 active immune response in a subset of individuals. Interestingly, the CNVs were also associated with  
455 serum NMR tyrosine and serum NMR histidine (**Table S5**), which potentially supports the findings of  
456 previous publications about the involvement of amino acid metabolism in immune response<sup>52,53</sup>.

457 Interestingly, we also indirectly measured mitochondrial (MT) genome copy number variation  
458 due to the mis-mapping of reads from mitochondrial DNA to ancient nuclear MT genome insertions  
459 (NUMT)<sup>54</sup> on chromosomes 1 and 17, that show strong homology to segments of the MT genome.  
460 These apparent “CNVs”, which reflect MT abundance in leukocytes, were strongly associated with  
461 fasting insulin levels ( $p=1.00 \times 10^{-10}$ ) and related traits, and are the topic of a separate study<sup>55</sup>.

462 We also discovered three association signals corresponding to dense clusters of fragmented  
463 CNV calls within highly repetitive and low-complexity regions including simple repeats and segmental  
464 duplications (**Table 2**). Interpreting patterns of variation and trait association at these loci remains  
465 challenging due to their complex and repetitive genomic architecture, and known alignment artifacts  
466 within such regions. Although we were not able to identify any technical artifacts that might explain

467 these specific associations, they should be interpreted with caution. Further investigation of these  
468 highly repetitive loci will require improved sequencing and variant detection methods.

469

## 470 **Discussion**

471 We have conducted what is to our knowledge the first complex trait association study based on direct  
472 ascertainment of SV from deep WGS data. Our study leverages sensitive SV detection methods,  
473 extensive cardiometabolic quantitative trait measurements, and the unique population history of  
474 Finland. Despite the relatively modest sample size and limited power of this study, we identified 9 novel  
475 and 6 known trait associated loci. Most notably, we identified two novel loci where SVs are the likely  
476 causal variants and have strong effects on disease-relevant traits. Both SVs are ultra-rare in non-  
477 Finnish Europeans but present at elevated allele frequency in Finns – presumably due to historical  
478 population bottlenecks and expansions – which mirrors the findings from our recent study of coding  
479 variation, where many cardiometabolic trait-associated variants were enriched in Finns<sup>14</sup>. The first, a  
480 deletion of the *ALB* promoter, strongly decreased serum albumin levels in carriers (~1 standard  
481 deviation per copy), and also resides on a haplotype associated with cholesterol levels. This example  
482 shows that non-coding SVs can have extremely large effects, consistent with our prior results based on  
483 eQTLs<sup>10</sup> and selective constraint<sup>18</sup>, and points to the importance of including diverse variant classes in  
484 trait association efforts. Although more work is required to understand the disease relevance of this  
485 deletion variant, we note that low levels of albumin can cause analbuminemia, which is associated with  
486 mild edema, hypotension, fatigue, lower body lipodystrophy, and hyperlipidemia.

487 The second, a multi-allelic CNV with both duplication and deletion alleles that affect *PDPR* gene  
488 dosage, has strong effects on pyruvate and alanine levels. Notably, this CNV is the product of recurrent  
489 NAHR between flanking repeats at a complex locus that has accumulated numerous segmental  
490 duplications over evolutionary time, and is not well-tagged by SNVs. This phenomenon – recurrent  
491 CNVs at segmentally duplicated loci – has been studied extensively in the context of human genomic  
492 disorders and primate genome evolution, but there are few examples for complex traits. This result

493 underscores the importance of comprehensive variant ascertainment in WGS-based studies of  
494 common disease and other complex traits. We further note that it is unusual to observe multiallelic  
495 CNVs at a conserved metabolic gene such as *PDPR*; it is tempting to speculate about the role of such  
496 variation in human evolution.

497 Interestingly, our study also identified two novel and highly atypical trait associations that appear  
498 to be caused by variable cell type composition in the peripheral blood. Identifying these results was only  
499 possible due to our use of WGS on blood-derived DNA, combined with sensitive SV analysis methods  
500 capable of detecting sub-clonal DNA copy number differences. Our quantitative detection of subclonal  
501 T-cell receptor locus deletions formed by V(D)J recombination served as a proxy for measuring T cell  
502 abundance, and led to the novel result that CRP levels are associated with T cell abundance. We  
503 hypothesize that this association is caused by active immune response in a subset of individuals.  
504 Similarly, our quantitative detection of mitochondrial genome copy number via apparent “CNVs” at  
505 NUMT sites in the nuclear genome led to the novel and important finding that variable abundance of  
506 neutrophils vs. platelets in peripheral blood is strongly associated with insulin, fat mass, and related  
507 metabolic traits (as described in detail elsewhere<sup>55</sup>).

508 Taken together, these results highlight the potential role of rare, large-effect SVs in the genetics  
509 of cardiometabolic traits, and suggest that future comprehensive and well-powered WGS-based studies  
510 have the potential to contribute greatly to our understanding of common disease genetics.

511

## 512 **Data Availability**

513 METSIM WGS, METSIM WES, and FINRISK WES sequence data are available through dbGaP  
514 (accessions phs001579, phs000752, and phs000756). METSIM variant and phenotype data will soon  
515 be available through AnVIL (accessions TBD). Genomic and phenotypic data for the FINRISK cohort  
516 are or will soon be obtainable through THL Biobank, the Finnish Institute for Health and Welfare,  
517 Finland (<https://thl.fi/en/web/thl-biobank>). Structural variant site frequency information is available in  
518 dbVAR (accession TBD). Summary statistics are available on GitHub (see **Web Resources**).

519

## 520 **Description of Supplemental Data**

521 Supplemental Data include seven figures and eight tables.

522

## 523 **Acknowledgements**

524 We thank D. Ray from Johns Hopkins University for her comments to the manuscript. This work was  
525 funded by an NHGRI CCDG award to IMH and NOS (UM1 HG008853) and DK U01 DK062370, the  
526 NHGRI large-scale sequencing grant (grant number 5U54HG003079), the Sigrid Jusélius Foundation  
527 (to SR), the University of Helsinki HiLIFE Fellow grants 2017-2020 (to SR), the Academy of Finland  
528 Center of Excellence in Complex Disease Genetics (grant number 312062 to SR, grant number 312074  
529 to SR and AP), the Academy of Finland (grant number 285380 to SR), the National Heart, Lung and  
530 Blood Institute (grant number T32HL007081 to EY), and the National Center for Advancing  
531 Translational Sciences (grant number UL1TR002345 to EY). The funders had no role in study design,  
532 data collection and analysis, decision to publish, or preparation of the manuscript. We thank the MGI  
533 administration and data production team, in particular R. Fulton, L. Fulton, C. Fronick, A. Wollam, S.K.  
534 Dutcher, and J. Milbrandt. The FINRISK samples used for the research were obtained from THL  
535 Biobank. We thank all study participants for their generous participation in the THL Biobank, FINRISK  
536 study, and METSIM study. ASH was supported by the Academy of Finland (grant no. 321356). LC was  
537 supported by the McDonnell International Scholars Academy Fellowship. AJS was supported by the Mr.  
538 and Mrs. Spencer T. Olin Fellowship for Women in Graduate Study.

539

## 540 **Author Contributions**

541 I.M.H. and N.O.S. conceived and directed the study. L.C., H.J.A, and I.D. adapted the GenomeSTRiP  
542 pipeline to perform CNV detection at scale. H.J.A. developed the pipeline for CNV genotyping based on  
543 CNVnator. L.C. and I.D. created the GenomeSTRiP callset; L.C. and H.J.A created the CNVnator  
544 callset; D.E.L. and K.L.K created the LUMPY callset, and led data management. L.C. led all analyses

545 related to trait association, SV genotyping using WES and array data, and investigation of candidate  
546 loci. H.J.A, D.E.L, I.D, L.G. and A.A.R. led GATK callset creation and QC for WGS data. A.P., S.R.,  
547 M.L, and J.K. contributed samples and phenotypic data. All authors edited the manuscript and/or  
548 provided intellectual contributions. L.C. and I.M.H. wrote the manuscript.

549

### 550 **Declaration of Interests**

551 N. O. S. has received research funding from Regeneron Pharmaceuticals unrelated to this study.  
552 The rest of authors declare no competing interests.

553

### 554 **Web Resources**

555 The summary statistics of all the tested SVs and traits are available through GitHub:

556 [https://github.com/hall-lab/FinnSV\\_paper\\_1220](https://github.com/hall-lab/FinnSV_paper_1220)

557

### 558 **References**

- 559 1. Wellcome Trust Case Control Consortium, Craddock, N., Hurles, M.E., Cardin, N., Pearson, R.D.,  
560 Plagnol, V., Robson, S., Vukcevic, D., Barnes, C., Conrad, D.F., et al. (2010). Genome-wide  
561 association study of CNVs in 16,000 cases of eight common diseases and 3,000 shared controls.  
562 *Nature* 464, 713–720.
- 563 2. McCarroll, S.A., Kuruvilla, F.G., Korn, J.M., Cawley, S., Nemesh, J., Wysoker, A., Shapero, M.H., de  
564 Bakker, P.I.W., Maller, J.B., Kirby, A., et al. (2008). Integrated detection and population-genetic  
565 analysis of SNPs and copy number variation. *Nat. Genet.* 40, 1166–1174.
- 566 3. Myocardial Infarction Genetics Consortium, Kathiresan, S., Voight, B.F., Purcell, S., Musunuru, K.,  
567 Ardissino, D., Mannucci, P.M., Anand, S., Engert, J.C., Samani, N.J., et al. (2009). Genome-wide  
568 association of early-onset myocardial infarction with single nucleotide polymorphisms and copy number  
569 variants. *Nat. Genet.* 41, 334–341.

- 570 4. Boettger, L.M., Salem, R.M., Handsaker, R.E., Peloso, G.M., Kathiresan, S., Hirschhorn, J.N., and  
571 McCarroll, S.A. (2016). Recurring exon deletions in the HP (haptoglobin) gene contribute to lower blood  
572 cholesterol levels. *Nat. Genet.* *48*, 359–366.
- 573 5. Usher, C.L., Handsaker, R.E., Esko, T., Tuke, M.A., Weedon, M.N., Hastie, A.R., Cao, H., Moon,  
574 J.E., Kashin, S., Fuchsberger, C., et al. (2015). Structural forms of the human amylase locus and their  
575 relationships to SNPs, haplotypes and obesity. *Nat. Genet.* *47*, 921–925.
- 576 6. Zekavat, S.M., Ruotsalainen, S., Handsaker, R.E., Alver, M., Bloom, J., Poterba, T., Seed, C., Ernst,  
577 J., Chaffin, M., Engreitz, J., et al. Deep coverage whole genome sequences and plasma lipoprotein(a)  
578 in individuals of European and African ancestries.
- 579 7. Macé, A., Tuke, M.A., Deelen, P., Kristiansson, K., Mattsson, H., Nõukas, M., Sapkota, Y., Schick,  
580 U., Porcu, E., Rüeger, S., et al. (2017). CNV-association meta-analysis in 191,161 European adults  
581 reveals new loci associated with anthropometric traits. *Nat. Commun.* *8*, 744.
- 582 8. Aguirre, M., Rivas, M.A., and Priest, J. (2019). Phenome-wide Burden of Copy-Number Variation in  
583 the UK Biobank. *Am. J. Hum. Genet.* *105*, 373–383.
- 584 9. Li, Y.R., Glessner, J.T., Coe, B.P., Li, J., Mohebnasab, M., Chang, X., Connolly, J., Kao, C., Wei, Z.,  
585 Bradfield, J., et al. (2020). Rare copy number variants in over 100,000 European ancestry subjects  
586 reveal multiple disease associations. *Nat. Commun.* *11*, 255.
- 587 10. Chiang, C., Scott, A.J., Davis, J.R., Tsang, E.K., Li, X., Kim, Y., Hadzic, T., Damani, F.N., Ganel, L.,  
588 Montgomery, S.B., et al. (2017). The impact of structural variation on human gene expression. *Nature*  
589 *Publishing Group* *49*, 692–699.
- 590 11. Li, X., Kim, Y., Tsang, E.K., Davis, J.R., Damani, F.N., Chiang, C., Hess, G.T., Zappala, Z., Strober,  
591 B.J., Scott, A.J., et al. (2017). The impact of rare variation on gene expression across tissues. *Nature*  
592 *550*, 239–243.

- 593 12. Lim, E.T., Würtz, P., Havulinna, A.S., Palta, P., Tukiainen, T., Rehnström, K., Esko, T., Mägi, R.,  
594 Inouye, M., Lappalainen, T., et al. (2014). Distribution and medical impact of loss-of-function variants in  
595 the Finnish founder population. *PLoS Genet.* *10*, e1004494.
- 596 13. Davis, J.P., Huyghe, J.R., Locke, A.E., Jackson, A.U., Sim, X., Stringham, H.M., Teslovich, T.M.,  
597 Welch, R.P., Fuchsberger, C., Narisu, N., et al. (2017). Common, low-frequency, and rare genetic  
598 variants associated with lipoprotein subclasses and triglyceride measures in Finnish men from the  
599 METSIM study. *PLoS Genet.* *13*, e1007079.
- 600 14. Locke, A.E., Steinberg, K.M., Chiang, C.W.K., Service, S.K., Havulinna, A.S., Stell, L., Pirinen, M.,  
601 Abel, H.J., Chiang, C.C., Fulton, R.S., et al. (2019). Exome sequencing of Finnish isolates enhances  
602 rare-variant association power. *Nature* *572*, 323–328.
- 603 15. Purcell, S., Cherny, S.S., and Sham, P.C. (2003). Genetic Power Calculator: design of linkage and  
604 association genetic mapping studies of complex traits. *Bioinformatics* *19*, 149–150.
- 605 16. Regier, A.A., Farjoun, Y., Larson, D., Krasheninina, O., Kang, H.M., Howrigan, D.P., Chen, B.-J.,  
606 Kher, M., Banks, E., Ames, D.C., et al. Functional equivalence of genome sequencing analysis  
607 pipelines enables harmonized variant calling across human genetics projects.
- 608 17. Larson, D.E., Abel, H.J., Chiang, C., Badve, A., Das, I., Eldred, J.M., Layer, R.M., and Hall, I.M.  
609 (2019). svtools: population-scale analysis of structural variation. *Bioinformatics* *35*, 4782–4787.
- 610 18. Abel, H.J., Larson, D.E., Regier, A.A., Chiang, C., Das, I., Kanchi, K.L., Layer, R.M., Neale, B.M.,  
611 Salerno, W.J., Reeves, C., et al. (2020). Mapping and characterization of structural variation in 17,795  
612 human genomes. *Nature*.
- 613 19. Layer, R.M., Chiang, C., Quinlan, A.R., and Hall, I.M. (2014). LUMPY: a probabilistic framework for  
614 structural variant discovery. *Genome Biol.* *15*, R84.
- 615 20. Abyzov, A., Urban, A.E., Snyder, M., and Gerstein, M. (2011). CNVnator: an approach to discover,



- 616 genotype, and characterize typical and atypical CNVs from family and population genome sequencing.  
617 *Genome Res.* *21*, 974–984.
- 618 21. Chiang, C., Layer, R.M., Faust, G.G., Lindberg, M.R., Rose, D.B., Garrison, E.P., Marth, G.T.,  
619 Quinlan, A.R., and Hall, I.M. (2015). SpeedSeq: ultra-fast personal genome analysis and interpretation.  
620 *Nat. Methods* *12*, 966–968.
- 621 22. Handsaker, R.E., Van Doren, V., Berman, J.R., Genovese, G., Kashin, S., Boettger, L.M., and  
622 McCarroll, S.A. (2015). Large multiallelic copy number variations in humans. *Nat. Genet.* *47*, 296–303.
- 623 23. Quinlan, A.R., and Hall, I.M. (2010). BEDTools: a flexible suite of utilities for comparing genomic  
624 features. *Bioinformatics* *26*, 841–842.
- 625 24. Li, J., and Ji, L. (2005). Adjusting multiple testing in multilocus analyses using the eigenvalues of a  
626 correlation matrix. *Heredity* *95*, 221–227.
- 627 25. Kang, H.M., Sul, J.H., Service, S.K., Zaitlen, N.A., Kong, S.-Y., Freimer, N.B., Sabatti, C., and  
628 Eskin, E. (2010). Variance component model to account for sample structure in genome-wide  
629 association studies. *Nat. Genet.* *42*, 348–354.
- 630 26. Kang, H.M. (2014). Efficient and parallelizable association container toolbox (EPACTS). University  
631 of Michigan Center for Statistical Genetics. Accessed 6, 16.
- 632 27. Auwera, G.A., Carneiro, M.O., Hartl, C., Poplin, R., del Angel, G., Levy-Moonshine, A., Jordan, T.,  
633 Shakir, K., Roazen, D., Thibault, J., et al. (2013). From FastQ Data to High-Confidence Variant Calls:  
634 The Genome Analysis Toolkit Best Practices Pipeline. *Current Protocols in Bioinformatics* *43*,.
- 635 28. Fromer, M., and Purcell, S.M. (2014). Using XHMM Software to Detect Copy Number Variation in  
636 Whole-Exome Sequencing Data. *Curr. Protoc. Hum. Genet.* *81*, 7.23.1–21.
- 637 29. Han, B., and Eskin, E. (2011). Random-effects model aimed at discovering associations in meta-  
638 analysis of genome-wide association studies. *Am. J. Hum. Genet.* *88*, 586–598.

- 639 30. Browning, B.L., Zhou, Y., and Browning, S.R. (2018). A One-Penny Imputed Genome from Next-  
640 Generation Reference Panels. *Am. J. Hum. Genet.* *103*, 338–348.
- 641 31. Thorvaldsdóttir, H., Robinson, J.T., and Mesirov, J.P. (2013). Integrative Genomics Viewer (IGV):  
642 high-performance genomics data visualization and exploration. *Brief. Bioinform.* *14*, 178–192.
- 643 32. Hormozdiari, F., Kostem, E., Kang, E.Y., Pasaniuc, B., and Eskin, E. (2014). Identifying causal  
644 variants at loci with multiple signals of association. *Genetics* *198*, 497–508.
- 645 33. Sudmant, P.H., Rausch, T., Gardner, E.J., Handsaker, R.E., Abyzov, A., Huddleston, J., Zhang, Y.,  
646 Ye, K., Jun, G., Fritz, M.H.-Y., et al. (2015). An integrated map of structural variation in 2,504 human  
647 genomes. *Nature* *526*, 75–81.
- 648 34. Collins, R.L., Brand, H., Karczewski, K.J., Zhao, X., Alföldi, J., Francioli, L.C., Khera, A.V., Lowther,  
649 C., Gauthier, L.D., Wang, H., et al. (2020). A structural variation reference for medical and population  
650 genetics. *Nature* *581*, 444–451.
- 651 35. Inouye, M., Ripatti, S., Kettunen, J., Lyytikäinen, L.-P., Oksala, N., Laurila, P.-P., Kangas, A.J.,  
652 Soininen, P., Savolainen, M.J., Viikari, J., et al. (2012). Novel Loci for metabolic networks and multi-  
653 tissue expression studies reveal genes for atherosclerosis. *PLoS Genet.* *8*, e1002907.
- 654 36. Kettunen, J., Tukiainen, T., Sarin, A.-P., Ortega-Alonso, A., Tikkanen, E., Lyytikäinen, L.-P.,  
655 Kangas, A.J., Soininen, P., Würtz, P., Silander, K., et al. (2012). Genome-wide association study  
656 identifies multiple loci influencing human serum metabolite levels. *Nat. Genet.* *44*, 269–276.
- 657 37. Kettunen, J., Demirkan, A., Würtz, P., Draisma, H.H.M., Haller, T., Rawal, R., Vaarhorst, A.,  
658 Kangas, A.J., Lyytikäinen, L.-P., Pirinen, M., et al. (2016). Genome-wide study for circulating  
659 metabolites identifies 62 loci and reveals novel systemic effects of LPA. *Nat. Commun.* *7*, 11122.
- 660 38. Surakka, I., Horikoshi, M., Mägi, R., Sarin, A.-P., Mahajan, A., Lagou, V., Marullo, L., Ferreira, T.,  
661 Miraglio, B., Timonen, S., et al. (2015). The impact of low-frequency and rare variants on lipid levels.

- 662 Nat. Genet. 47, 589–597.
- 663 39. Buniello, A., MacArthur, J.A.L., Cerezo, M., Harris, L.W., Hayhurst, J., Malangone, C., McMahon,  
664 A., Morales, J., Mountjoy, E., Sollis, E., et al. (2019). The NHGRI-EBI GWAS Catalog of published  
665 genome-wide association studies, targeted arrays and summary statistics 2019. *Nucleic Acids Res.* 47,  
666 D1005–D1012.
- 667 40. PheWeb.
- 668 41. Jiang, Z., Tang, H., Ventura, M., Cardone, M.F., Marques-Bonet, T., She, X., Pevzner, P.A., and  
669 Eichler, E.E. (2007). Ancestral reconstruction of segmental duplications reveals punctuated cores of  
670 human genome evolution. *Nat. Genet.* 39, 1361–1368.
- 671 42. Johnson, M.E., National Institute of Health Intramural Sequencing Center Comparative Sequencing  
672 Program, Cheng, Z., Morrison, V.A., Scherer, S., Ventura, M., Gibbs, R.A., Green, E.D., and Eichler,  
673 E.E. (2006). Recurrent duplication-driven transposition of DNA during hominoid evolution. *Proc. Natl.*  
674 *Acad. Sci. U. S. A.* 103, 17626–17631.
- 675 43. Cantsilieris, S., Sunkin, S.M., Johnson, M.E., Anaclerio, F., Huddleston, J., Baker, C., Dougherty,  
676 M.L., Underwood, J.G., Sulovari, A., Hsieh, P., et al. (2020). An evolutionary driver of interspersed  
677 segmental duplications in primates. *Genome Biol.* 21, 202.
- 678 44. Miga, K.H., Koren, S., Rhie, A., Vollger, M.R., Gershman, A., Bzikadze, A., Brooks, S., Howe, E.,  
679 Porubsky, D., Logsdon, G.A., et al. (2020). Telomere-to-telomere assembly of a complete human X  
680 chromosome. *Nature* 585, 79–84.
- 681 45. Sadrzadeh, S.M.H., and Bozorgmehr, J. (2004). Haptoglobin phenotypes in health and disorders.  
682 *Am. J. Clin. Pathol.* 121 *Suppl*, S97–S104.
- 683 46. Lin, H., Lee, E., Hestir, K., Leo, C., Huang, M., Bosch, E., Halenbeck, R., Wu, G., Zhou, A.,  
684 Behrens, D., et al. (2008). Discovery of a cytokine and its receptor by functional screening of the

685 extracellular proteome. *Science* 320, 807–811.

686 47. Murr, C., Grammer, T.B., Meinitzer, A., Kleber, M.E., März, W., and Fuchs, D. (2014). Immune  
687 activation and inflammation in patients with cardiovascular disease are associated with higher  
688 phenylalanine to tyrosine ratios: the ludwigshafen risk and cardiovascular health study. *J. Amino Acids*  
689 2014, 783730.

690 48. Chang, E.-J., Lee, S.K., Song, Y.S., Jang, Y.J., Park, H.S., Hong, J.P., Ko, A.R., Kim, D.Y., Kim, J.-  
691 H., Lee, Y.J., et al. (2014). IL-34 is associated with obesity, chronic inflammation, and insulin  
692 resistance. *J. Clin. Endocrinol. Metab.* 99, E1263–E1271.

693 49. Li, Z., Jin, D., Wu, Y., Zhang, K., Hu, P., Cao, X., and Chen, Z. (2012). Increased serum interleukin-  
694 34 in patients with coronary artery disease. *J. Int. Med. Res.* 40, 1866–1870.

695 50. Zorena, K., Jachimowicz-Duda, O., and Wąż, P. (2016). The cut-off value for interleukin 34 as an  
696 additional potential inflammatory biomarker for the prediction of the risk of diabetic complications.  
697 *Biomarkers* 21, 276–282.

698 51. Fan, Q., Yan, X., Zhang, H., Lu, L., Zhang, Q., Wang, F., Xi, R., Hu, J., Chen, Q., Niu, W., et al.  
699 (2016). IL-34 is associated with the presence and severity of renal dysfunction and coronary artery  
700 disease in patients with heart failure. *Sci. Rep.* 6, 39324.

701 52. Grohmann, U., and Bronte, V. (2010). Control of immune response by amino acid metabolism.  
702 *Immunol. Rev.* 236, 243–264.

703 53. Li, P., Yin, Y.-L., Li, D., Kim, S.W., and Wu, G. (2007). Amino acids and immune function. *Br. J.*  
704 *Nutr.* 98, 237–252.

705 54. Lopez, J.V., Yuhki, N., Masuda, R., Modi, W., and O'Brien, S.J. (1994). Numt, a recent transfer and  
706 tandem amplification of mitochondrial DNA to the nuclear genome of the domestic cat. *J. Mol. Evol.* 39,  
707 174–190.

- 708 55. Ganel, L., Chen, L., Christ, R., Vangipurapu, J., Young, E., Das, I., Kanchi, K., Larson, D., Regier,  
709 A., Abel, H., et al. (2020). Mitochondrial genome copy number in human blood-derived DNA is strongly  
710 associated with insulin levels and related metabolic traits and primarily reflects cell-type composition  
711 differences. medRxiv 2020.10.23.20218586.
- 712 56. ENCODE Project Consortium (2004). The ENCODE (ENCyclopedia Of DNA Elements) Project.  
713 *Science* 306, 636–640.
- 714 57. Karolchik, D., Baertsch, R., Diekhans, M., Furey, T.S., Hinrichs, A., Lu, Y.T., Roskin, K.M.,  
715 Schwartz, M., Sugnet, C.W., Thomas, D.J., et al. (2003). The UCSC Genome Browser Database.  
716 *Nucleic Acids Res.* 31, 51–54.
- 717

718 **Figures**

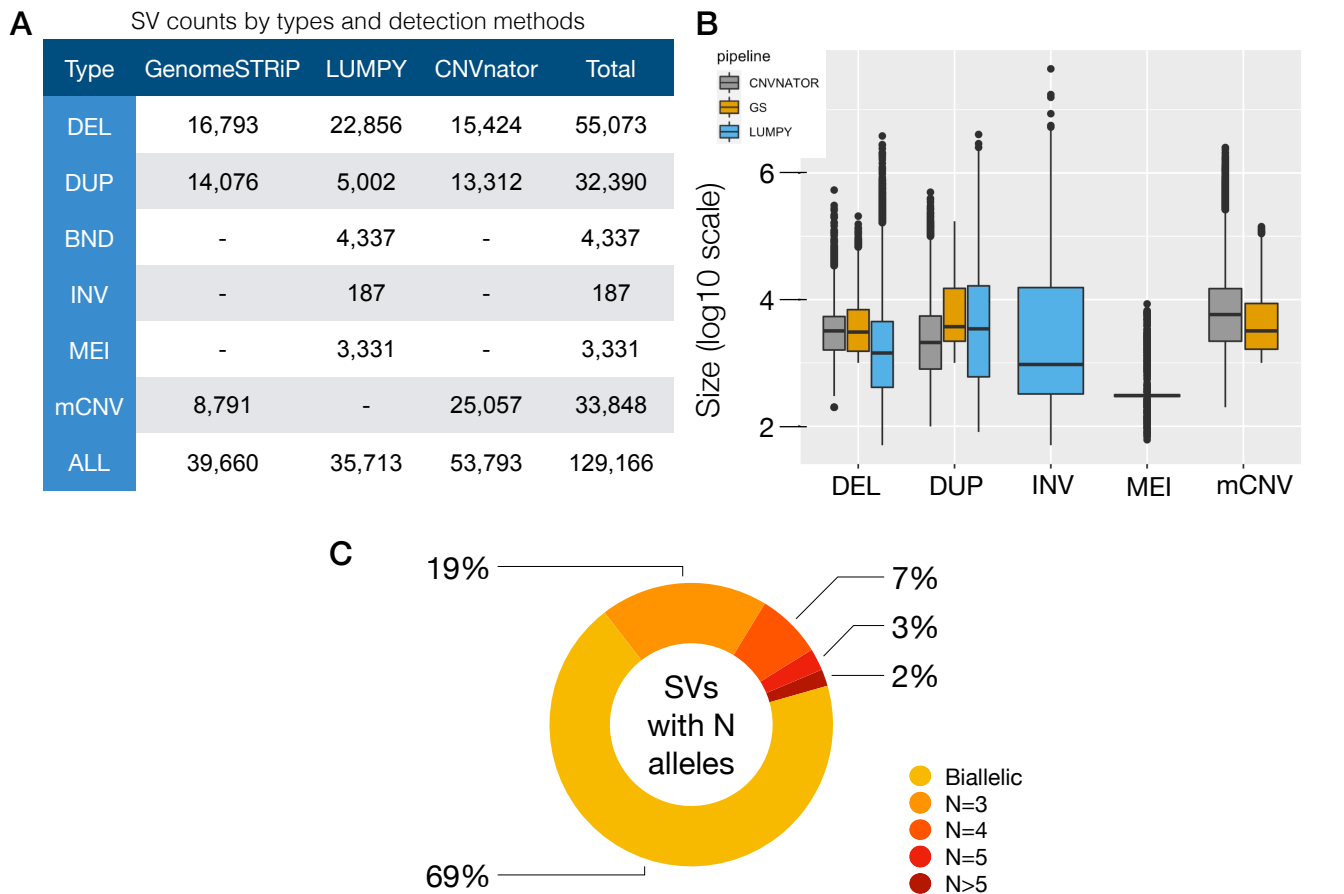

719

720 **Figure 1. Overview of the high-confidence SV callset**

721 **(A)** Count of high-confidence autosomal SVs stratified by variant type and detection method including  
 722 deletions (DEL), duplications (DUP), multi-allelic copy number variants (mCNV), inversions (INV),  
 723 mobile element insertions (MEI) and generic rearrangements of unknown architecture (BND). **(B)** SV  
 724 size distribution (log<sub>10</sub> scale, bp) by variant type and detection method. mCNVs were only detected by  
 725 read-depth based pipelines, INV and MEI variants were only detected in the LUMPY pipeline, and  
 726 BNDs are not included due to the ambiguous definition of variant boundaries. **(C)** Proportion of bi-allelic  
 727 SVs and multi-allelic CNVs, where N is defined by the number of copy number groups (e.g.  
 728 CN=0,1,2,3,4, etc.)

729

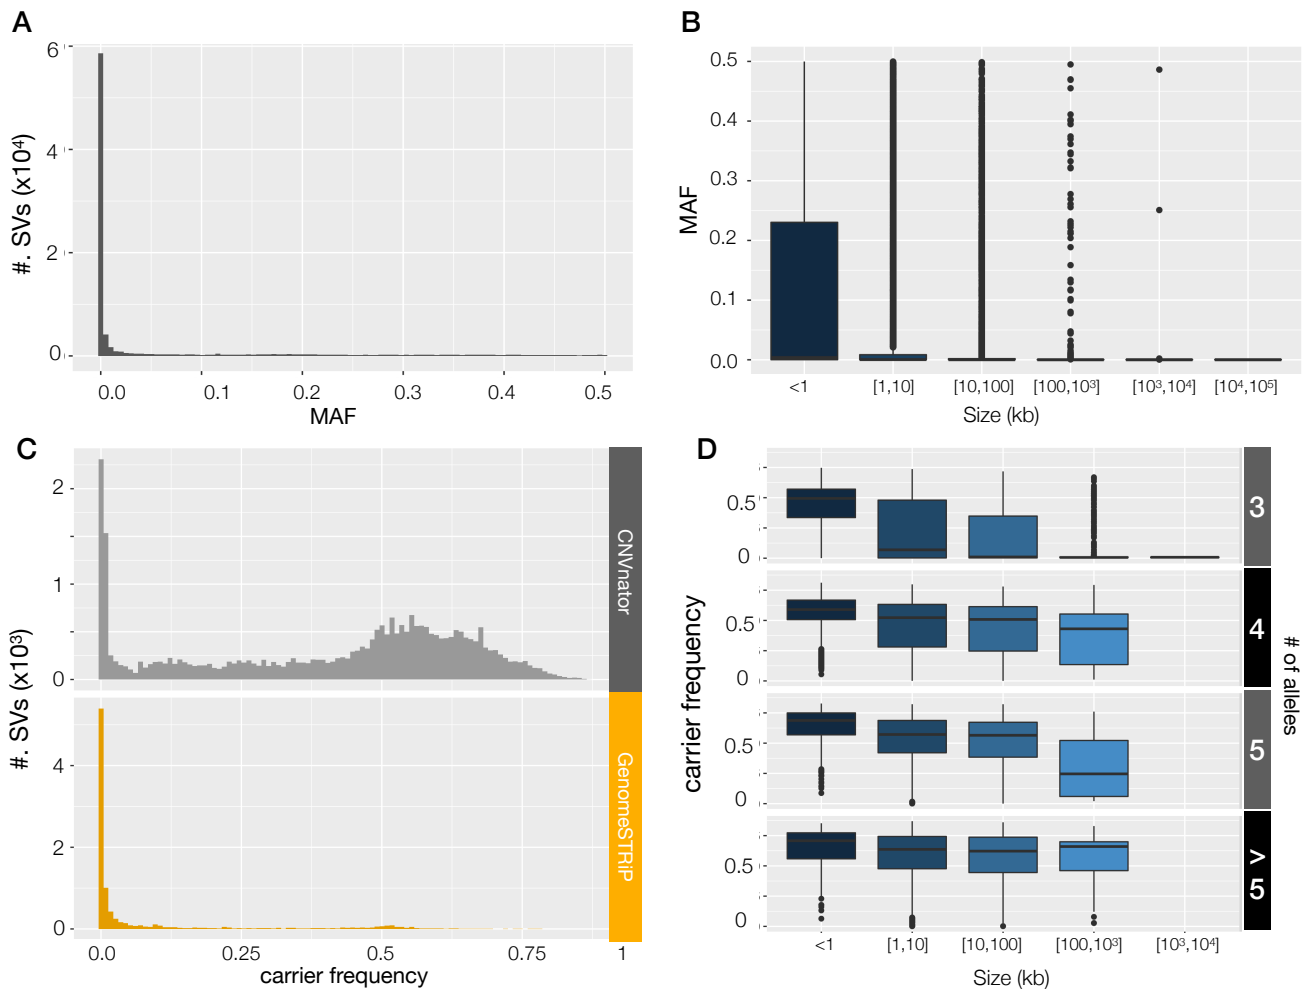

730

731 **Figure 2. Frequency distribution of the high-confidence SVs**

732 **(A)** The minor allele frequency distribution of all the high-confidence bi-allelic SVs and **(B)** the MAF  
733 distribution stratified by variant sizes. **(C) and (D)** are similar plots for multi-allelic CNVs, showing the  
734 frequency of carriers (non-diploid samples), stratified by detection methods. Note that the concentration  
735 of CNVnator variants between 0.5-0.75 were primarily caused by large segmental duplication regions  
736 near centromeres and telomeres, where the variant boundaries were challenging to define and the  
737 CNVs were detected in highly fragmented form. Such regions are often excluded from genetic analysis  
738 but were included here to maximize sensitivity.

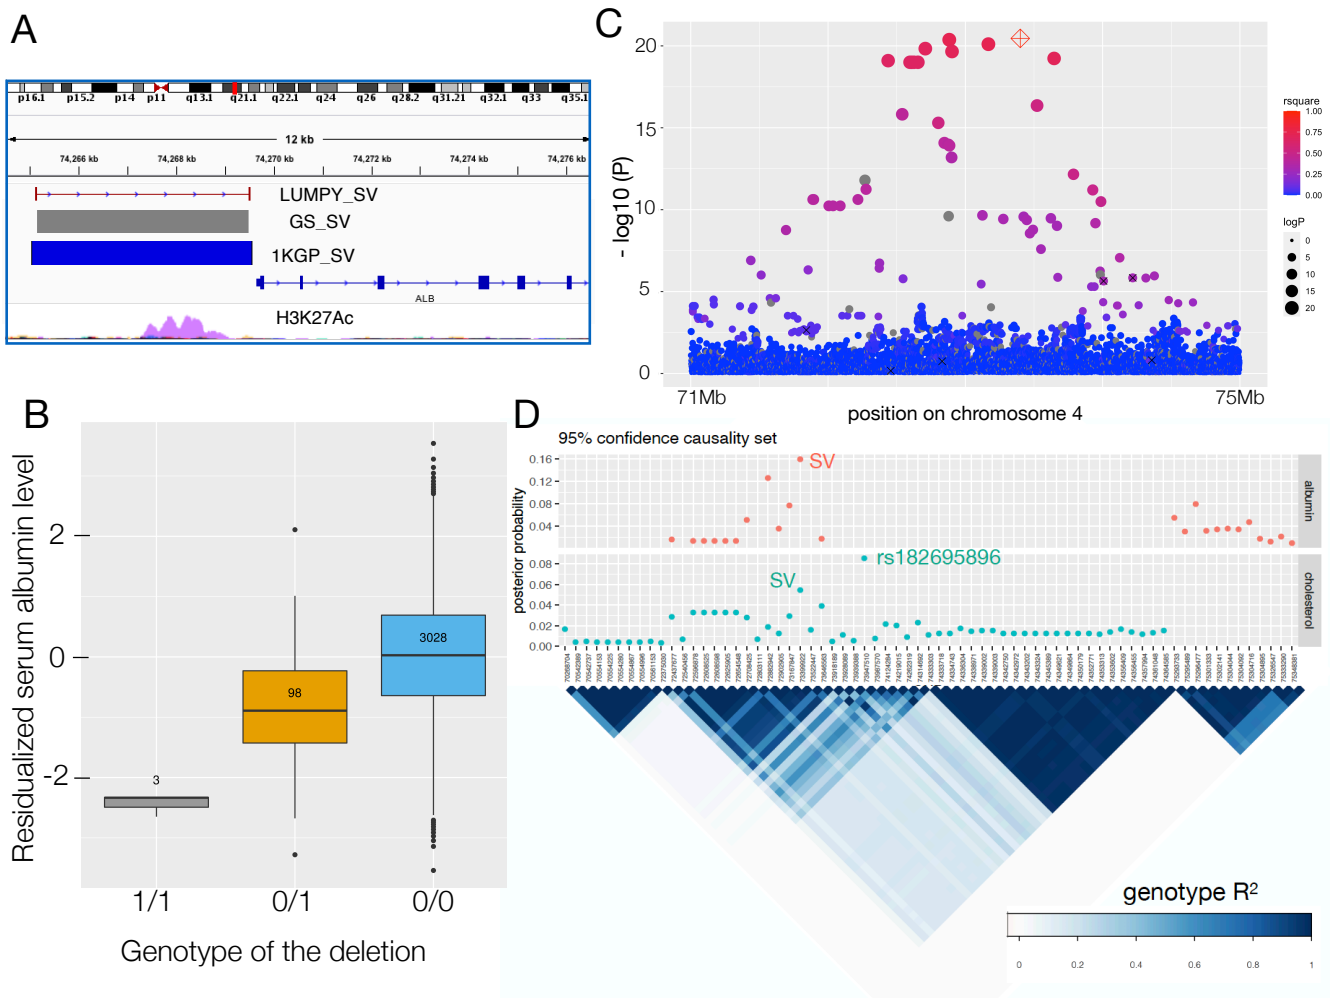

739

740 **Figure 3. The *ALB* promoter deletion associated with serum albumin level and cholesterol traits**

741 **(A)** The genomic location of the chr4 deletion, with coordinates detected from LUMPY, GenomeSTRiP  
 742 and 1KG. The H3K27Ac track is from the ENCODE<sup>56</sup> data obtained from the UCSC genome browser.

743 **(B)** Boxplot showing serum albumin levels stratified by genotype, with the sample size of each  
 744 genotype group annotated at the center of each box. The trait value on the y-axis is the inverse  
 745 normalized residual of raw measurement (residualized for age, age<sup>2</sup>, and sex).

746 **(C)** Local Manhattan plot of albumin association signals on chr4:71-75Mb, including the *ALB* deletion (red diamond) and  
 747 SNPs with minimum allele count of 9 (filled circles). The sizes of the circles are proportional to -log<sub>10</sub>(p)  
 748 and colors indicated LD (Pearson R<sup>2</sup>) with the deletion (NA shown in grey). Six of the seven previously  
 749 published GWAS signals are indicated with 'x' (the seventh was too rare in our data to be included in  
 750 the test).

**(D)** Fine-mapping results at the *ALB* locus for albumin and total cholesterol trait associations,



751 using CAVIAR. The top panel shows the 95% confidence causality sets for albumin (top) and  
 752 cholesterol (bottom) and posterior probability of each variant to be causal (assuming a maximum of two  
 753 causal variants). The bottom panel shows the LD structure for the candidate variants, using the  
 754 genotype correlation (Pearson  $R^2$ ) calculated from WGS data.

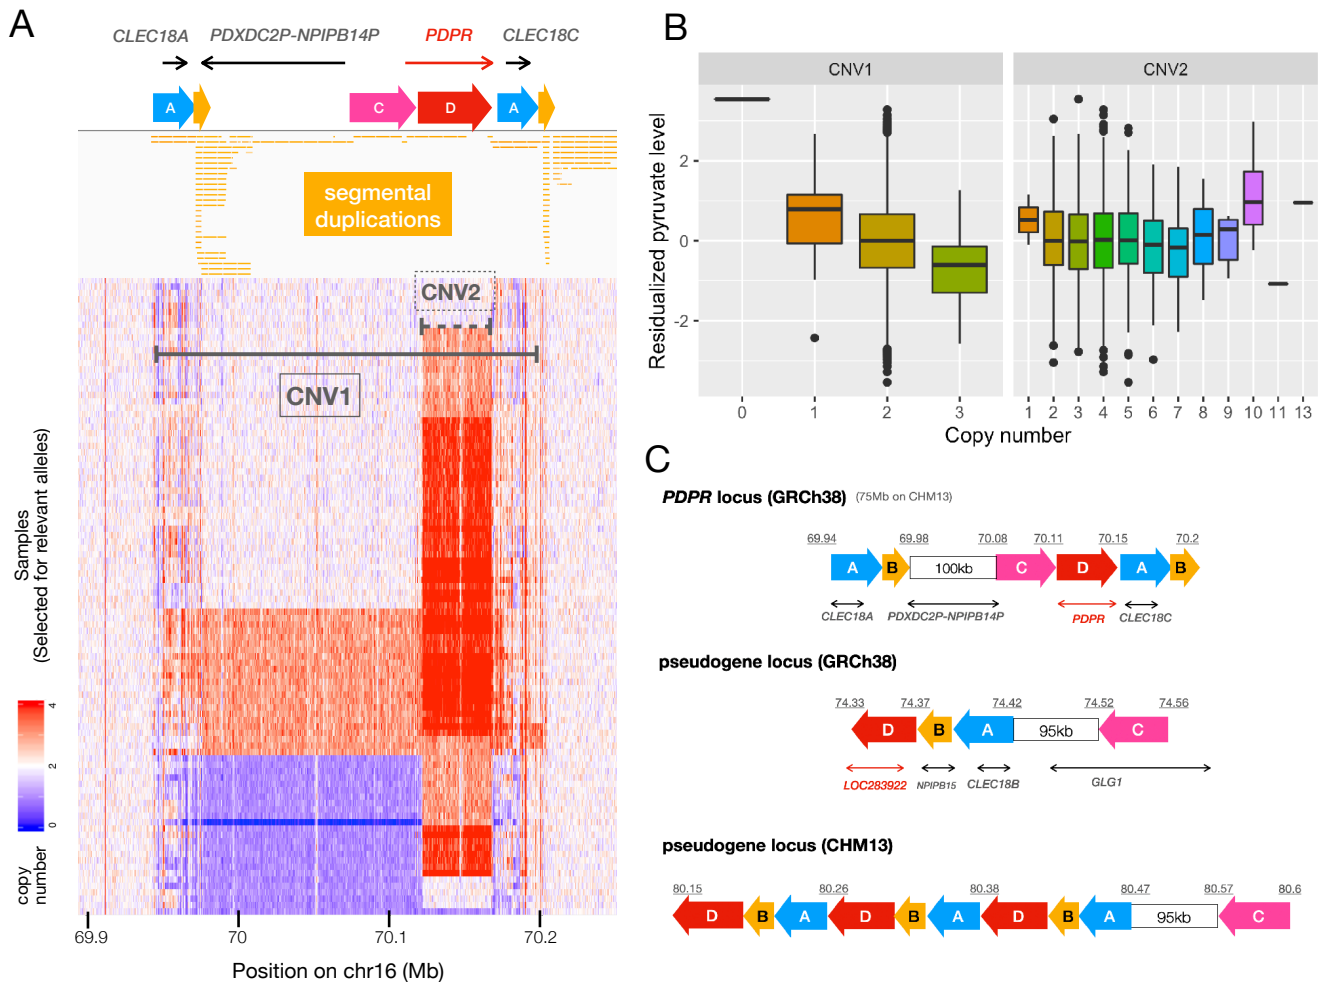

755

756 **Figure 4. The multi-allelic CNV at the *PDPR* locus affecting pyruvate and alanine.**

757 **(A)** The *PDPR* locus showing (from top to bottom) genes, duplicated genomic segments based on  
 758 dotplot analysis (see **Figure S6**), segmental duplication annotations from the UCSC table browser<sup>57</sup>,  
 759 and copy number profiles for 100 samples comprising 51 carriers and 49 non-carriers for CNV1. Copy  
 760 number is shown in 500bp windows, as determined by CNVnator, and the color saturates at four  
 761 copies. The two horizontal lines indicate locations of the two CNVs (solid-CNV1, dashed-CNV2). **(B)**  
 762 Pyruvate levels for 3,121 WGS samples stratified by copy number genotypes of CNV1 ( $p=9.41 \times 10^{-11}$ )

763 and CNV2 ( $p=0.6$ ). **(C)** Structure of GRCh38 reference and CHM13 assembly at the *PDPR* locus (top)  
764 and its pseudogene locus (bottom two), using the same annotations as in part (A). Blocks with the  
765 same color and letter notation are highly similar DNA sequences and arrows show the direction of  
766 alignments. Diagrams were drawn based on the dot plots in **Figure S6**. The segment B corresponds to  
767 LCR16a, the core element shared by many duplicons sparsely distributed on chromosome 16<sup>41</sup>.  
768

769 **Tables**

770 **Table 1.** Callsets QC metrics

| QC Metrics         | Variants Subset | LUMPY   | GS      | CNVNATOR |
|--------------------|-----------------|---------|---------|----------|
| CNV FDR*           | all             | -       | 27%     | 25%      |
|                    | high confidence | 0.80%   | 3%      | 9%       |
| Counts             | all             | 120,793 | 111,141 | 92,862   |
|                    | high confidence | 35,713  | 39,660  | 53,793   |
|                    | common          | 11,633  | 11,062  | 41,877   |
| Overlap w. 1kg*    | all             | 10%     | 10%     | 11%      |
|                    | high confidence | 34%     | 21%     | 15%      |
|                    | common          | 49%     | 34%     | 13%      |
| Overlap w. gnomad* | all             | 18%     | 14%     | 25%      |
|                    | high confidence | 47%     | 27%     | 27%      |
|                    | common          | 60%     | 40%     | 27%      |
| Tagged by SNPs     | high confidence | 63%     | 62%     | 46%      |
|                    | common          | 77%     | 65%     | 49%      |

771 \*CNVs only

772 **Table 1.** Quality control metrics of the SV callsets including all variants, high-confidence variants, and  
 773 high-confidence common variants (defined by  $\geq 10$  carriers). CNV FDR was estimated by intensity  
 774 rank sum test (IRS) using the SNP array data from METSIM samples. Note that LUMPY CNVs are by  
 775 definition high confidence due to confirmation of independent read-depth support during variant  
 776 classification steps (see **Methods**). Variant overlaps with 1KG and gnomAD were defined based  
 777 on  $>50\%$  reciprocal overlap. “Tagged by SNPs” was defined as SVs that are in LD ( $\max r^2 \geq 0.5$ ) with  
 778 any SNP in the 1Mb flanking regions.

779

780

**Table 2.** Summary statistics for all the genome-wide significant signals

| SV type  | Gene or annotation | Top trait          | Chr | P WGS    | P GWAS conditioned | BETA WGS    | P combined | REP | Novel | Carrier frequency |
|----------|--------------------|--------------------|-----|----------|--------------------|-------------|------------|-----|-------|-------------------|
| deletion | ALB                | Albumin            | 4   | 3.49E-21 | 1.05E-10           | 0.9107      | 1.47E-54*  | IMP | Y     | 0.03              |
| deletion | HP                 | Glyco-protein      | 16  | 1.38E-10 | 3.63E-04           | -<br>0.1628 | 3.53E-35*  | IMP | N     | 0.55              |
| mCNV     | PDPR               | Pyruvate           | 16  | 9.41E-11 | 1.07E-10           | -<br>0.7175 | 4.81E-21*  | WES | Y     | 0.02              |
| TCR      | TRAV               | CRP                | 14  | 1.30E-15 | 1.89E-15           | 1.207       | 1.51E-16*  | WES | Y     | 0.36              |
| deletion | HNF1A-AS           | CRP                | 12  | 7.23E-04 | 3.60E-01           | 0.1912      | 4E-13*     | IMP | N     | 0.55              |
| TCR      | TRBV               | CRP                | 7   | 3.36E-09 | 6.29E-09           | 0.8429      | 2.47E-16*  | WES | Y     | 0.38              |
| mCNV     | NUMTS              | Fast insulin       | 1   | 1.00E-10 | NA                 | -<br>0.1179 | 1E-10*     | NA  | Y     | 0                 |
| MEI      | LEPR               | CRP                | 1   | 3.94E-04 | 2.20E-01           | 0.164       | 4.5E-13*   | IMP | N     | 0.51              |
| deletion | IL34               | Tyrosine           | 16  | 2.10E-04 | 5.45E-04           | 1.954       | 4.17E-10*  | IMP | Y     | 0.02              |
| MEI      | CDH13              | Adiponectin        | 16  | 1.24E-04 | 1.91E-02           | -<br>0.3282 | 3.68E-08   | IMP | N     | 0.24              |
| mCNV     | AMDHD1             | Histidine          | 12  | 4.74E-04 | 2.72E-01           | 0.1485      | 5.33E-07   | IMP | N     | 0.52              |
| mCNV     | SegDup cluster     | Fatty acid         | 16  | 1.10E-06 | NA                 | -<br>0.1615 | 1.10E-06   | NA  | Y     | 0.57              |
| mCNV     | SegDup cluster     | Glutamine          | 9   | 1.25E-06 | NA                 | -<br>0.7937 | 1.25E-06   | NA  | Y     | 0.43              |
| deletion | PLTP               | Small HDL Particle | 20  | 2.40E-04 | 3.81E-02           | 0.1122      | 1.24E-06   | IMP | N     | 0.53              |
| mCNV     | Simple repeats     | Creatinine         | 4   | 1.41E-06 | NA                 | -<br>0.3949 | 1.41E-06   | NA  | Y     | 0.01              |

781 \* experiment-wide significant

782 **Table 2.** Summary statistics for 15 genome-wide significant loci with the top associated traits. Highly  
783 correlated SVs showing the same signal were manually inspected and clumped together. The genome-  
784 wide significance threshold was  $1.89 \times 10^{-6}$  and the experiment-wide significance threshold was  $3.32 \times 10^{-8}$   
785 (see **Table S2** and **Methods** for details). The p value from WGS analysis and the p value from the  
786 replication experiment (IMP-imputation, WES-WES read-depth analysis, if applicable) were combined  
787 by Fisher's method and used to determine the significance level. The carrier frequency was calculated  
788 in the WGS dataset. The column of "P GWAS conditioned" shows the SV p value conditioned on all  
789 intrachromosomal GWAS SNPs from GWAS Catalog<sup>39</sup>, using WGS data only (see **Methods**)
